# Supplementary material for: Synthesis and characterization of high grafting density bottle-brush poly(oxa)norbornene-g-poly(ε-caprolactone)
Source: Royal Society of Chemistry journal article supplement (doi:10.1039/c6py00094k), 2016-01-01
Supplement: c6py00094k1.pdf [file c6py00094k1.pdf]

## Supporting Information

# Synthesis and characterization of high grafting density bottle-brush poly(oxa)norbornene-*g*- poly( $\epsilon$ -caprolactone)

*Duc Anh N'Guyen, Flavien Leroux, Véronique Montembault, Sagrario Pascual and Laurent  
Fontaine\**

Institut des Molécules et Matériaux du Mans (IMMM), Equipe Méthodologie et Synthèse des  
Polymères, UMR CNRS 6283, Université du Maine, Avenue Olivier Messiaen, 72085 Le  
Mans Cedex 9, France

\* Corresponding author: [laurent.fontaine@univ-lemans.fr](mailto:laurent.fontaine@univ-lemans.fr)

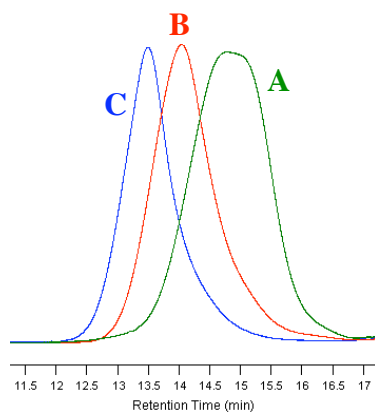

**Figure S1.** SEC traces for the (A) **OX-PCL<sub>24</sub>** (Table 1, run 1), (B) **OX-PCL<sub>52</sub>** (Table 1, run 2) and (C) **OX-PCL<sub>92</sub>** (Table 1, run 3).

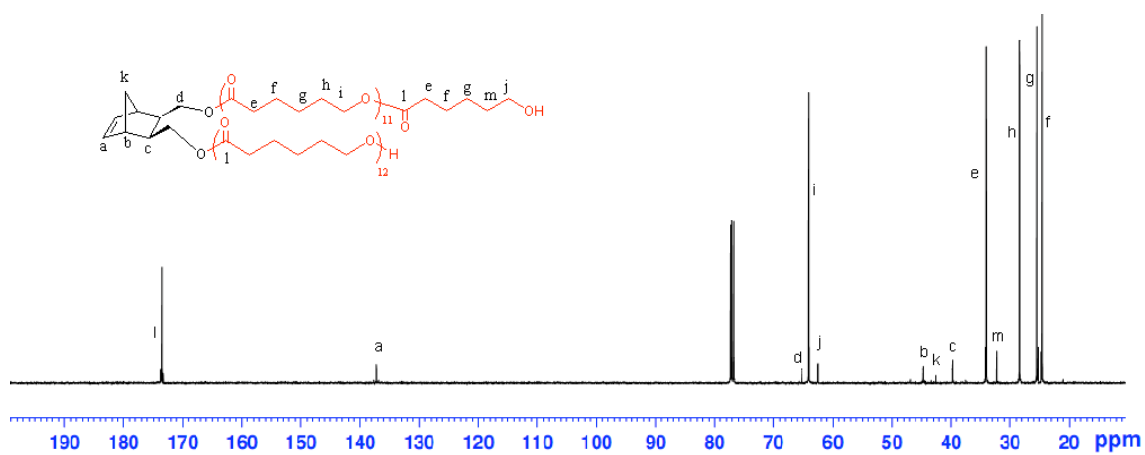

**Figure S2.**  $^{13}\text{C}$  NMR spectrum (100 MHz,  $\text{CDCl}_3$ , 25 °C) of precipitated **NB-PCL**<sub>24</sub> from the ROP of CL in THF at 25°C using **NB** as the initiator and TBD as the catalyst with  $[\text{CL}]_0/[\text{NB}]_0 = 20$  (Table 1, run 4).

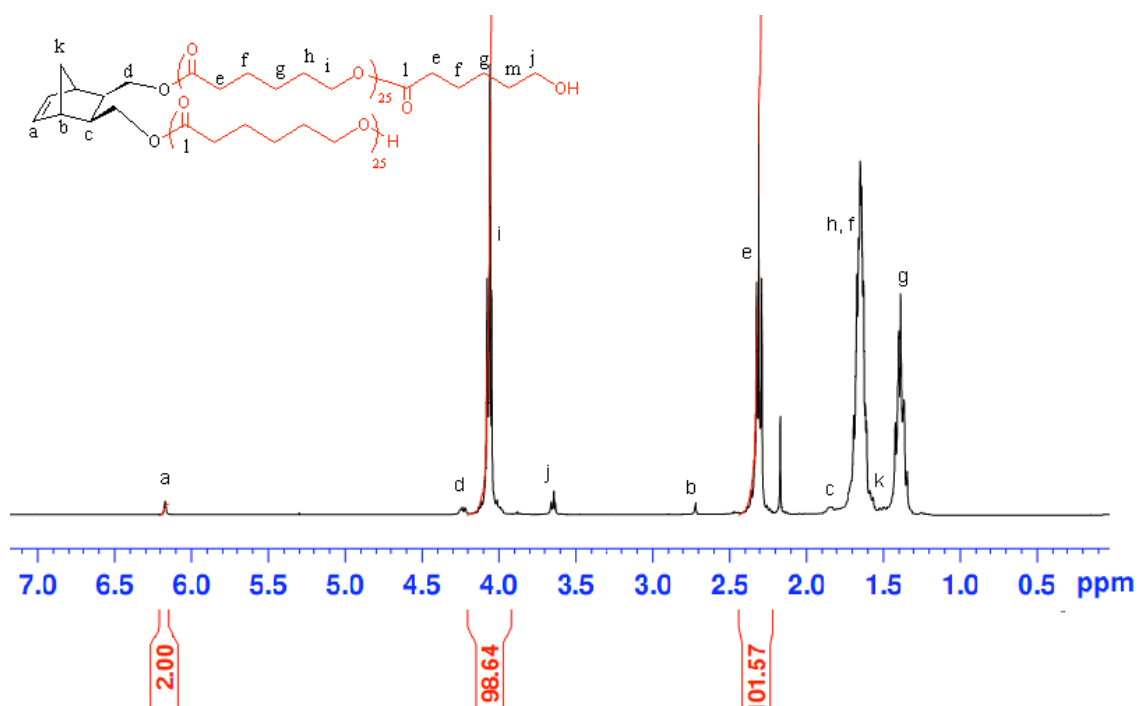

**Figure S3.**  $^1\text{H}$  NMR spectrum (400 MHz,  $\text{CDCl}_3$ , 25 °C) of precipitated **NB-PCL**<sub>51</sub> from the ROP of CL in THF at 25°C using **NB** as the initiator and TBD as the catalyst with  $[\text{CL}]_0/[\text{NB}]_0 = 48$  (Table 1, run 5).

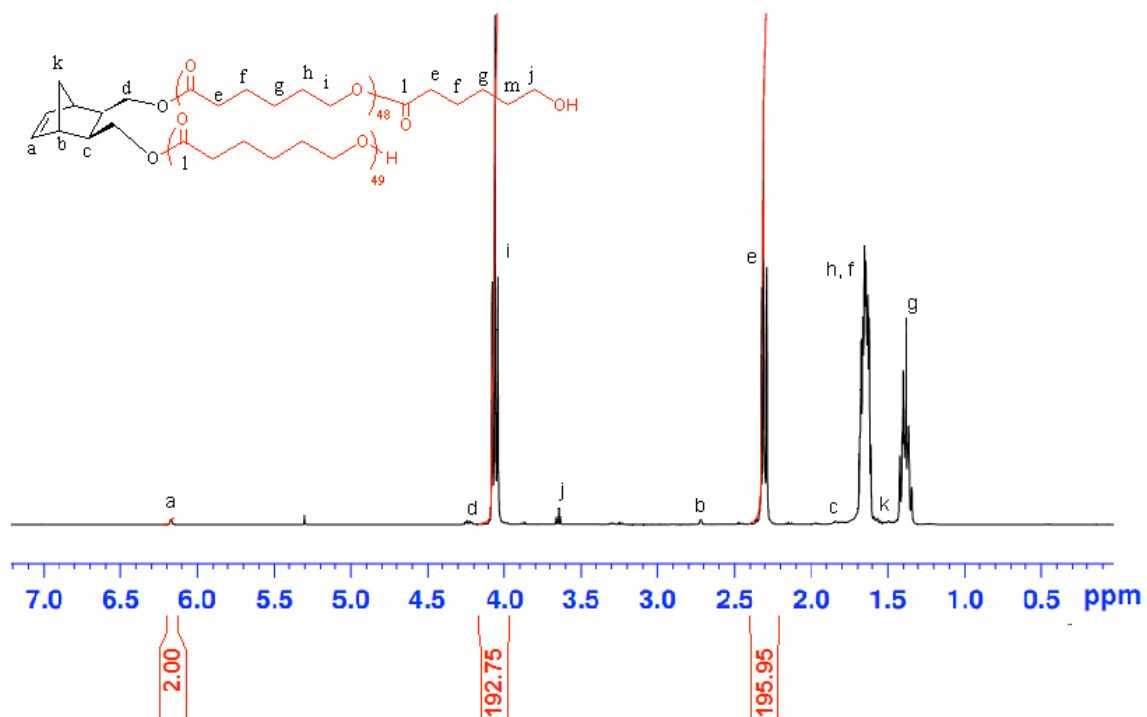

**Figure S4.**  $^1\text{H}$  NMR spectrum (400 MHz,  $\text{CDCl}_3$ , 25  $^\circ\text{C}$ ) of precipitated **NB-PCL**<sub>98</sub> from the ROP of CL in THF at 25 $^\circ\text{C}$  using **NB** as the initiator and TBD as the catalyst with  $[\text{CL}]_0/[\text{NB}]_0 = 96$  (Table 1, run 6).

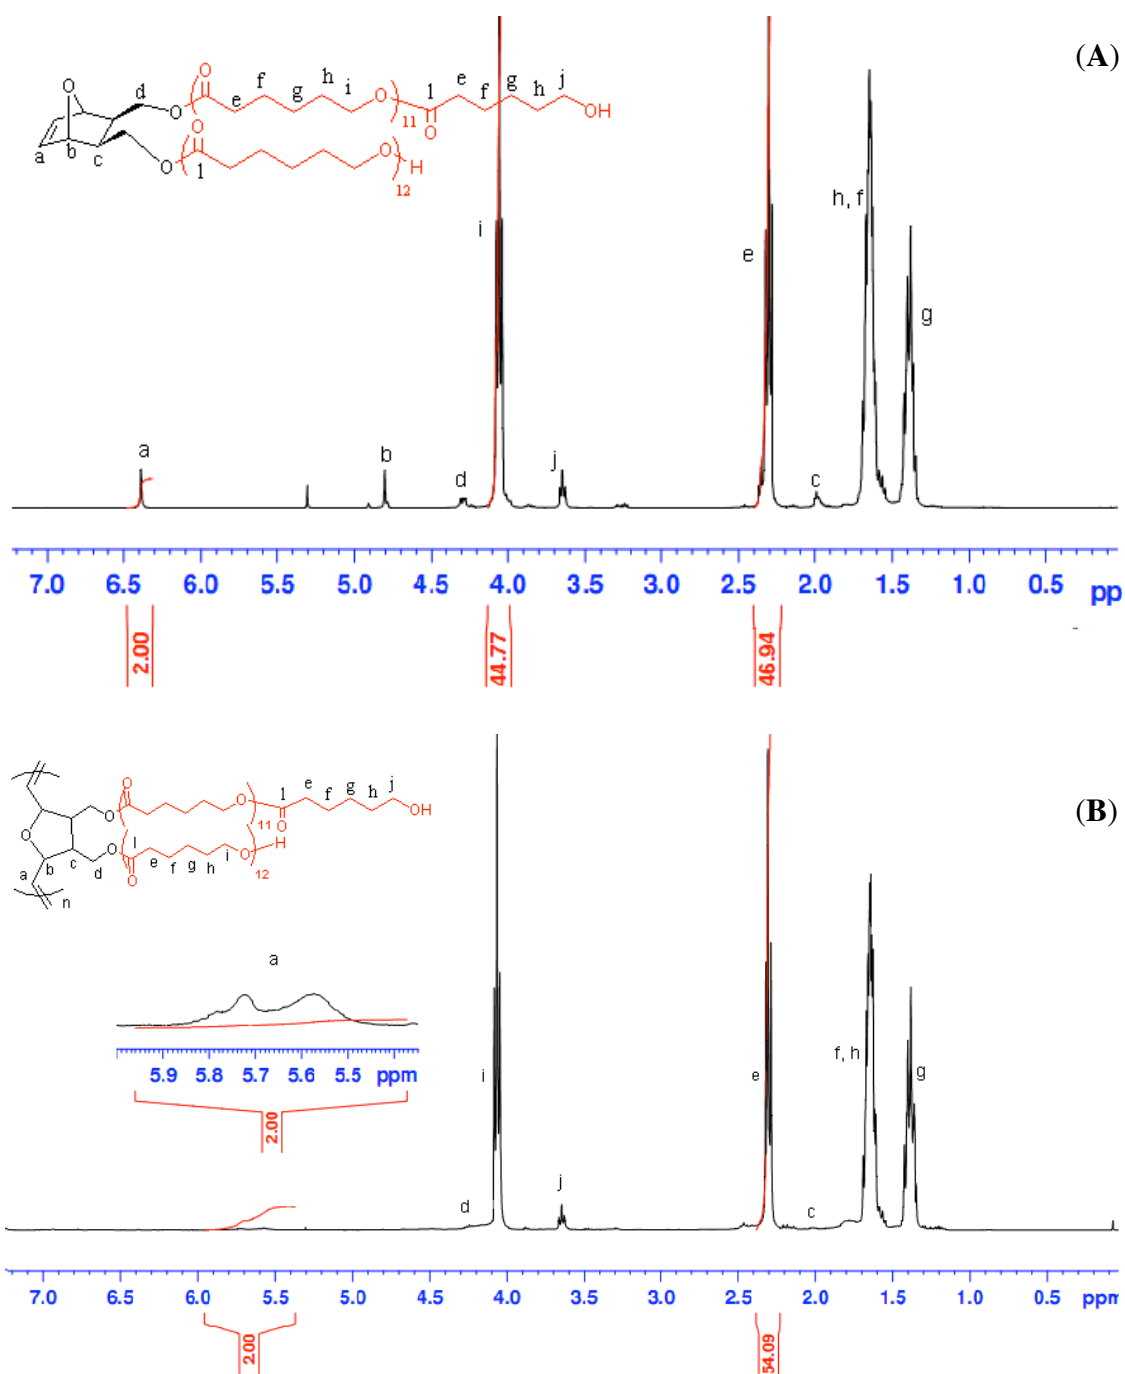

**Figure S5.** <sup>1</sup>H NMR spectra (400 MHz, CDCl<sub>3</sub>, 25 °C) of (A) precipitated **OX-PCL**<sub>24</sub> from the ROP of CL in THF at 25°C using **OX** as the initiator and TBD as the catalyst with [CL]<sub>0</sub>/[**OX**]<sub>0</sub> = 20 (Table 1, run 1) and (B) crude **POX**<sub>10-g-PCL</sub><sub>24</sub> obtained from the ROMP of **OX-PCL**<sub>24</sub> in toluene at 70°C using **G2** as the catalyst with [OX-PCL<sub>24</sub>]/[**G2**] = 10 for a reaction time of 3 h (Table 2, run 1).

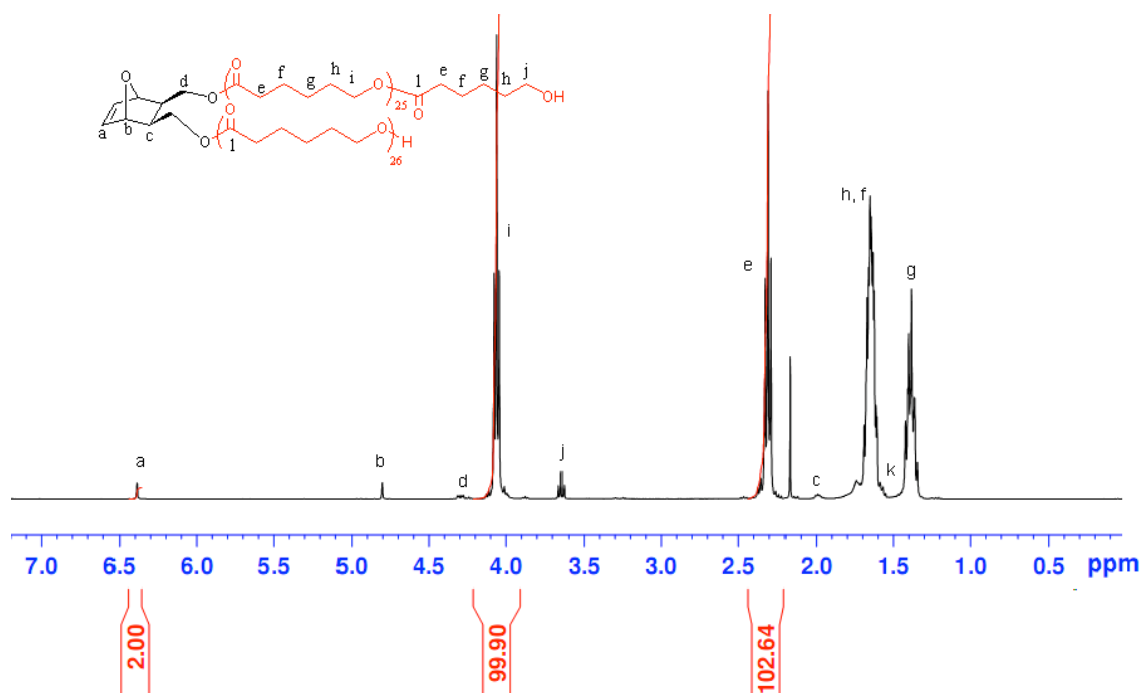

**Figure S6.**  $^1\text{H}$  NMR spectrum (400 MHz,  $\text{CDCl}_3$ , 25  $^\circ\text{C}$ ) of precipitated **OX-PCL<sub>52</sub>** from the ROP of CL in THF at 25 $^\circ\text{C}$  using **OX** as the initiator and TBD as the catalyst with  $[\text{CL}]_0/[\text{OX}]_0 = 48$  (Table 1, run 2).

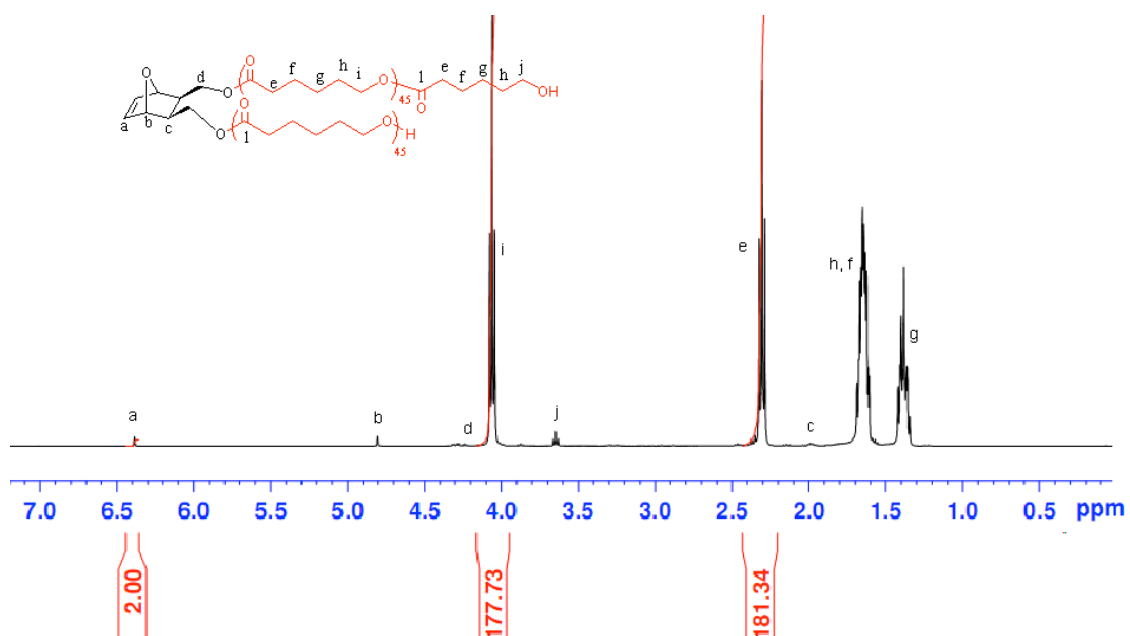

**Figure S7.**  $^1\text{H}$  NMR spectrum (400 MHz,  $\text{CDCl}_3$ , 25  $^\circ\text{C}$ ) of precipitated **OX-PCL<sub>92</sub>** from the ROP of CL in THF at 25 $^\circ\text{C}$  using **OX** as the initiator and TBD as the catalyst with  $[\text{CL}]_0/[\text{OX}]_0 = 96$  (Table 1, run 3).

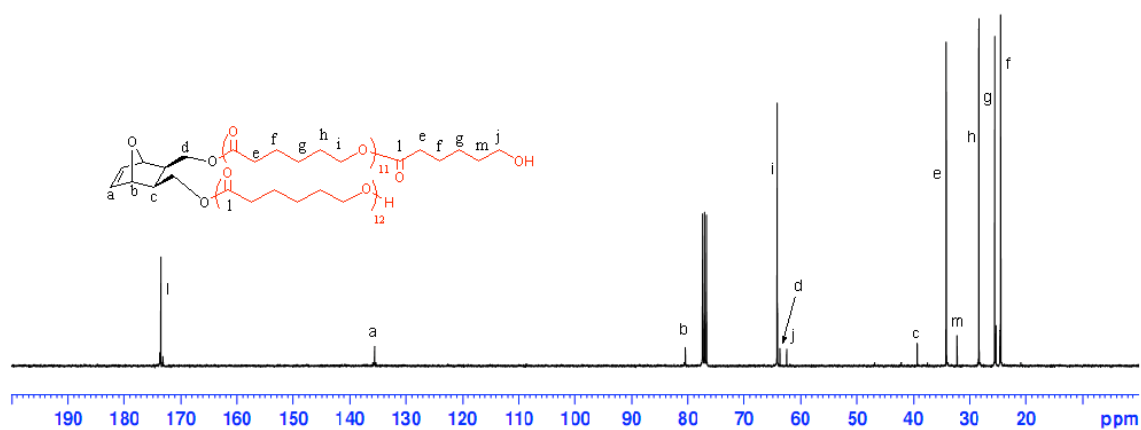

**Figure S8.**  $^{13}\text{C}$  NMR spectrum (100 MHz,  $\text{CDCl}_3$ , 25 °C) of precipitated **OX-PCL**<sub>24</sub> from the ROP of CL in THF at 25 °C using **OX** as the initiator and TBD as the catalyst with  $[\text{CL}]_0/[\text{OX}]_0 = 20$  (Table 1, run 1).

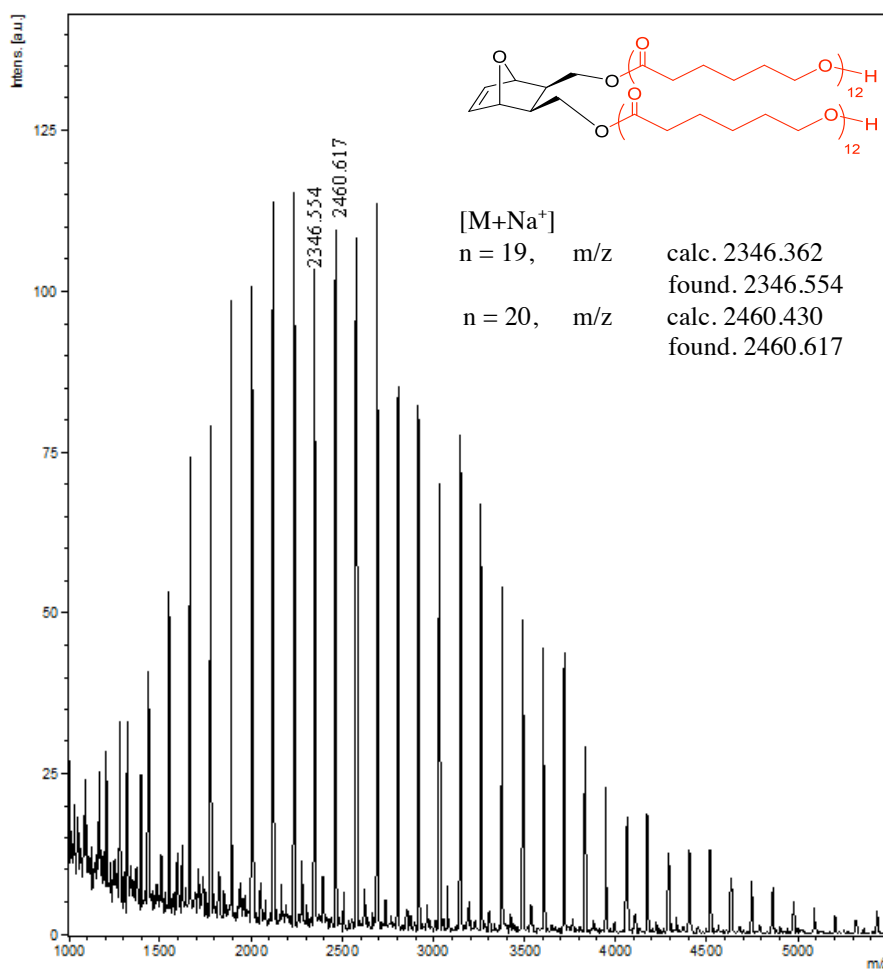

**Figure S9.** MALDI-TOF mass spectrum (matrix: *trans*-2-[3-(4-*tert*-butylphenyl)-2-methyl-2-propenylidene]malononitrile (DCTB) + sodium trifluoroacetate (NaTFA)) of the PCL-based norbornene synthesized by ROP using **OX** as the initiator and TBD as the catalyst in THF at 25°C with  $[CL]_0/[OX]_0 = 20/1$  (Table 1, run 1).



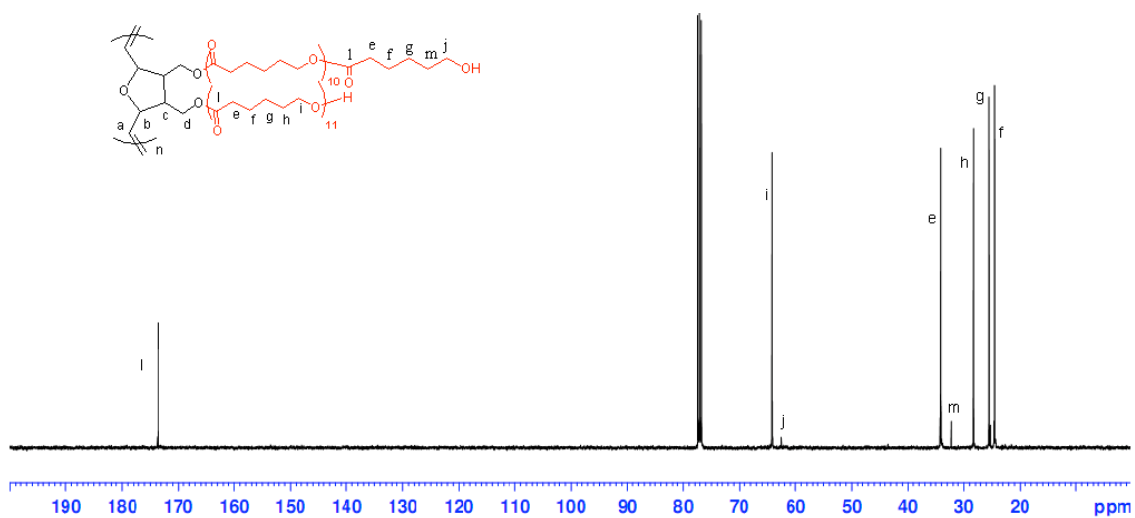

**Figure S10.**  $^{13}\text{C}$  NMR spectrum (100 MHz,  $\text{CDCl}_3$ , 25 °C) of **POX<sub>10</sub>-g-PCL<sub>24</sub>** obtained from the ROMP of **OX-PCL<sub>24</sub>** in toluene at 70°C using **G2** as the catalyst with  $[\text{OX-PCL}_{24}]/[\text{G2}] = 10$  for a reaction time of 3 h (Table 2, run 1).

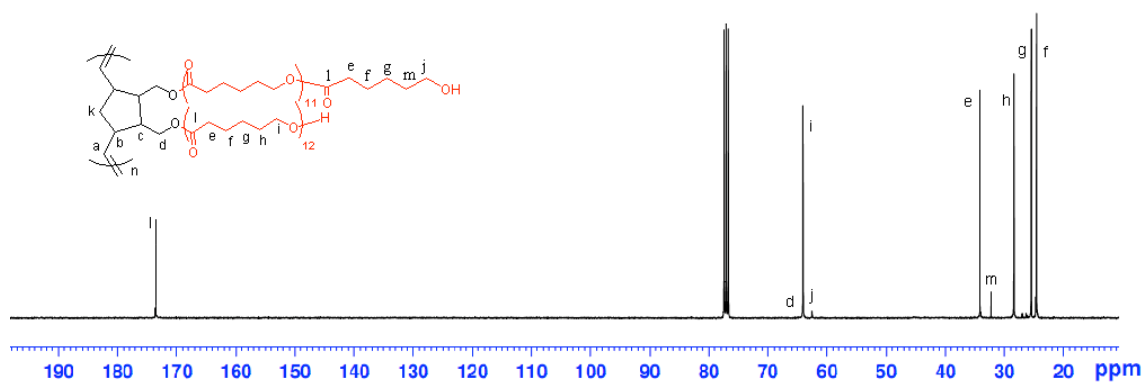

**Figure S11.**  $^{13}\text{C}$  NMR spectrum (100 MHz,  $\text{CDCl}_3$ , 25 °C) of **PNB<sub>10</sub>-g-PCL<sub>24</sub>** obtained from the ROMP of **NB-PCL<sub>24</sub>** in toluene at 70°C using **G2** as the catalyst with  $[\text{NB-PCL}_{24}]/[\text{G2}] = 10$  for a reaction time of 3 h (Table 2, run 8).

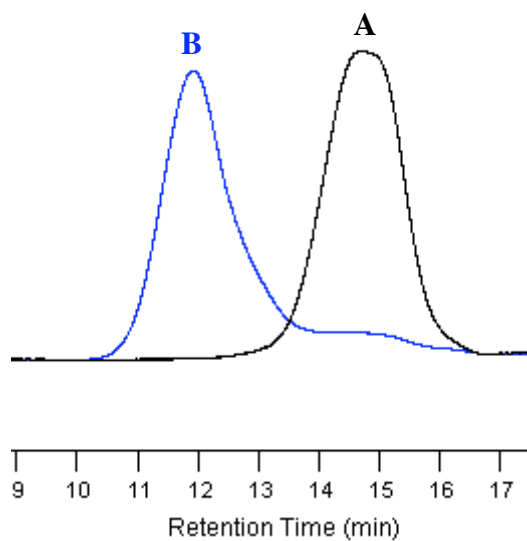

**Figure S12.** SEC traces for the (A) precipitated **OX-PCL<sub>24</sub>** (Table 1, run 1) and (B) crude **POX<sub>10</sub>-g-PCL<sub>24</sub>** obtained by ROMP of **OX-PCL<sub>24</sub>** initiated by **G2** (Table 2, run 1).

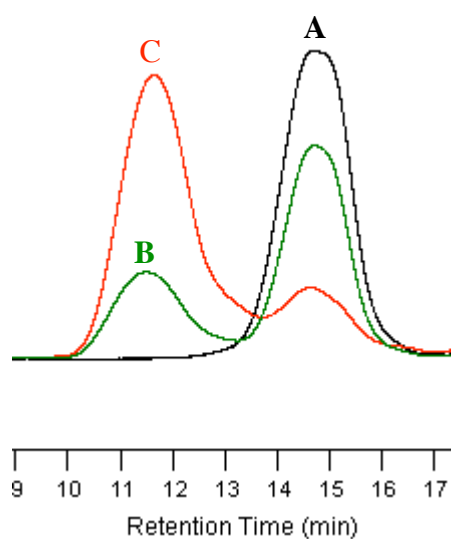

**Figure S13.** SEC traces for the (A) precipitated **OX-PCL<sub>24</sub>** (Table 1, run 1), (B) crude **POX<sub>50</sub>-g-PCL<sub>24</sub>** (Table 2, run 2) and (C) crude **POX<sub>100</sub>-g-PCL<sub>24</sub>** (Table 2, run 3) obtained by ROMP of **OX-PCL<sub>24</sub>** initiated by **G2**.

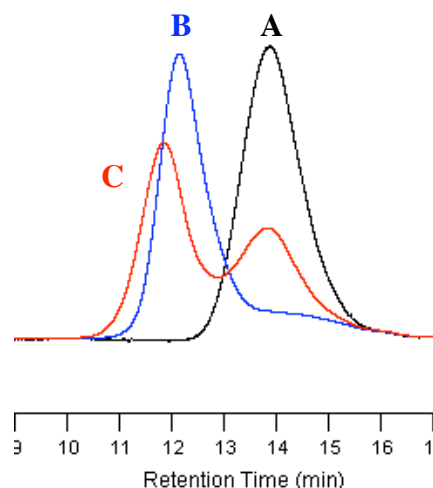

**Figure S14.** SEC traces for the (A) precipitated **OX-PCL<sub>52</sub>** (Table 1, run 2), (B) crude **POX<sub>10-g</sub>-PCL<sub>52</sub>** (Table 2, run 4) and (C) crude **POX<sub>50-g</sub>-PCL<sub>52</sub>** (Table 2, run 5) obtained by ROMP of **OX-PCL<sub>52</sub>** initiated by **G2**.

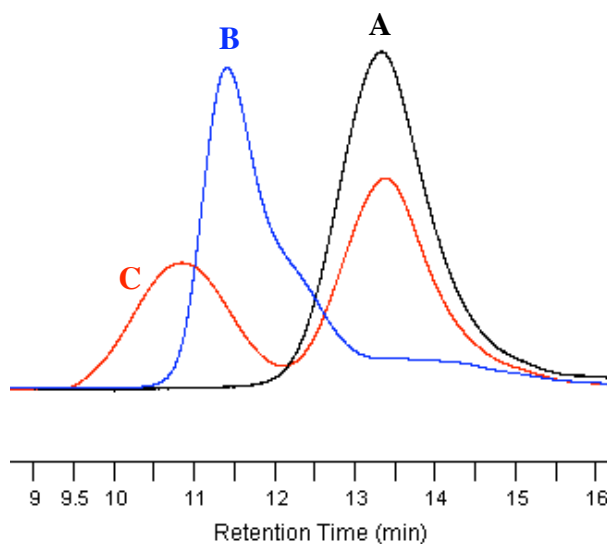

**Figure S15.** SEC traces for the (A) precipitated **OX-PCL<sub>92</sub>** (Table 1, run 3), (B) crude **POX<sub>10-g</sub>-PCL<sub>92</sub>** (Table 2, run 6) and (C) crude **POX<sub>50-g</sub>-PCL<sub>92</sub>** (Table 2, run 7) obtained by ROMP of **OX-PCL<sub>92</sub>** initiated by **G2**.

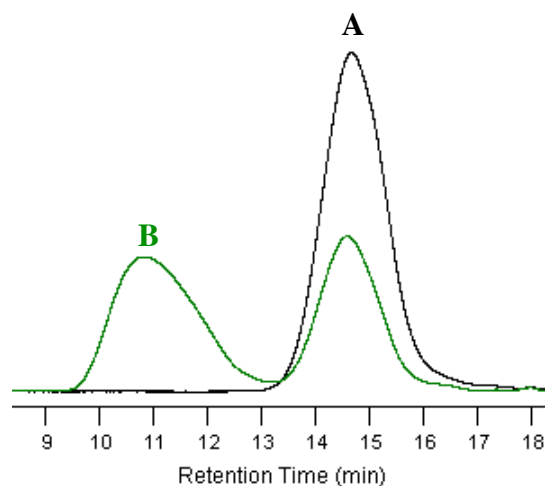

**Figure S16.** SEC traces for the (A) precipitated **NB-PCL<sub>24</sub>** (Table 1, run 4) and (B) crude **PNB<sub>100</sub>-g-PCL<sub>24</sub>** obtained by ROMP of **NB-PCL<sub>24</sub>** initiated by **G2** (Table 2, run 10).

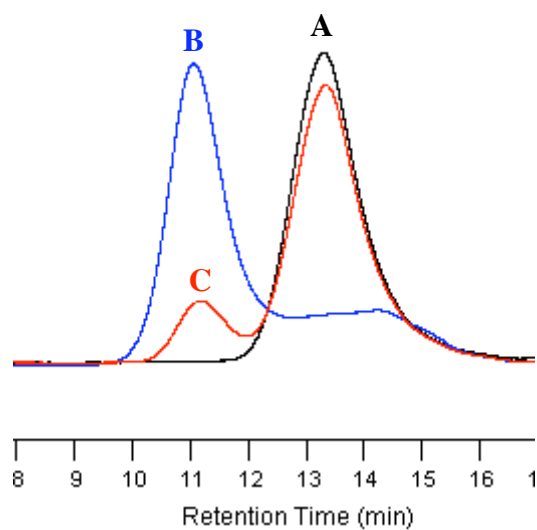

**Figure S17.** SEC traces for the (A) precipitated **NB-PCL<sub>98</sub>** (Table 1, run 6), (B) crude **PNB<sub>10</sub>-g-PCL<sub>98</sub>** (Table 2, run 16) and (C) crude **PNB<sub>50</sub>-g-PCL<sub>98</sub>** (Table 2, run 17) obtained by ROMP of **NB-PCL<sub>98</sub>** initiated by **G2**.

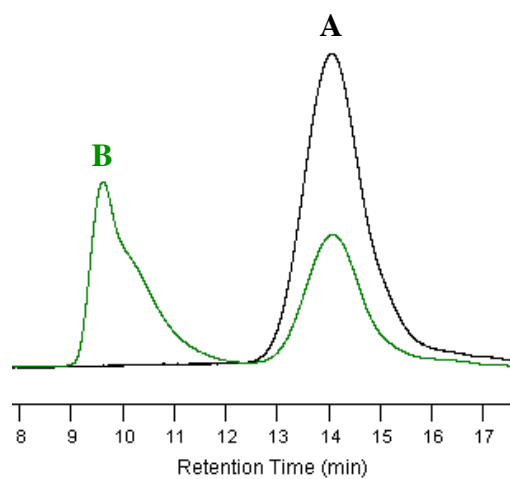

**Figure S18.** SEC traces for the (A) precipitated **NB-PCL<sub>51</sub>** (Table 1, run 4) and (B) crude **PNB<sub>200</sub>-g-PCL<sub>51</sub>** (Table 2, run 15) obtained by ROMP of **NB-PCL<sub>51</sub>** initiated by **G3'**.

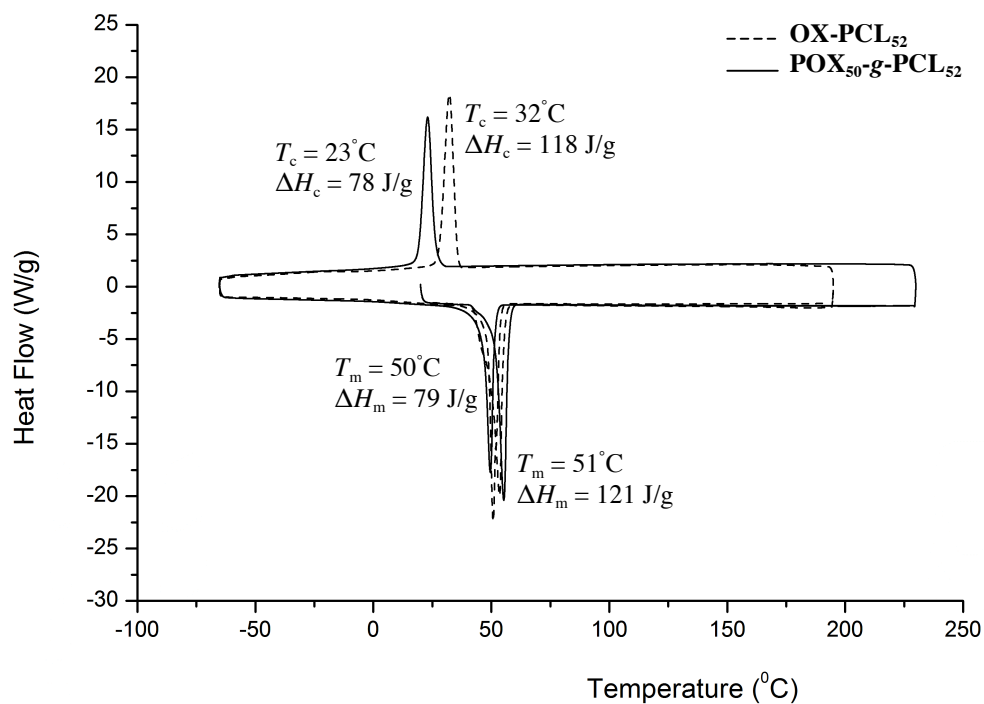

**Figure S19.** DSC traces of **POX<sub>50-g</sub>-PCL<sub>52</sub>** (full line) (Table 2, run 5) and **OX-PCL<sub>52</sub>** (dashed line) (Table 1, run 2).

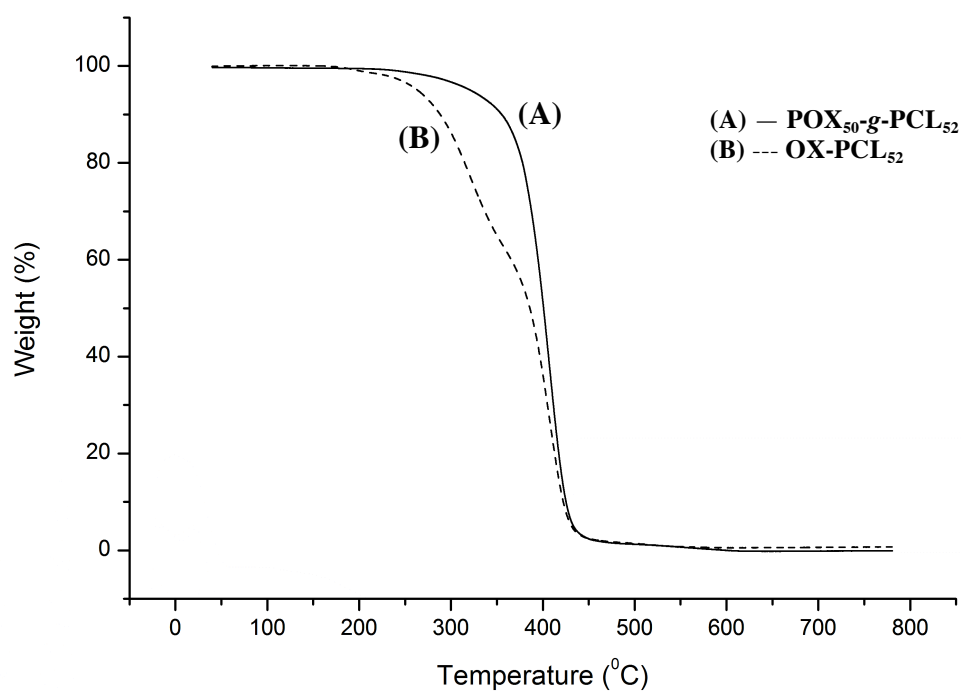

**Figure S20.** Comparison of TGA curves for (A) **POX<sub>50-g</sub>-PCL<sub>52</sub>** (full line) (Table 2, run 5) and (B) **OX-PCL<sub>52</sub>** (dashed line) (Table 1, run 2).
